# Supplementary material for: MTHFR c.677C>T Inhibits Cell Proliferation and Decreases Prostate Cancer Susceptibility in the Han Chinese Population in Shanghai
Source: PubMed Central journal article supplement (PMC5098242; doi:10.1038/srep36290), 2016-11-07
Supplement: srep36290-s1.pdf [file srep36290-s1.pdf]

## Supplementary file

### ***MTHFR* c.677C>T Inhibits Cell Proliferation and Decreases Prostate Cancer Susceptibility in the Han Chinese Population in Shanghai**

**Running head: *MTHFR* c.677C>T decreases PCa susceptibility**

Jun-Long Wu<sup>1,5,†</sup>, Shu-Xian Zhou<sup>2,3,†</sup>, Rui Zhao<sup>2,3</sup>, Xuan Zhang<sup>2</sup>, Kun Chang<sup>1,5</sup>, Cheng-Yuan Gu<sup>1,5</sup>, Hua-Lei Gan<sup>4,5</sup>, Bo Dai<sup>1,5</sup>, Yao Zhu<sup>1,5</sup>, Hai-Liang Zhang<sup>1,5</sup>, Guo-Hai Shi<sup>1,5</sup>, Yuan-Yuan Qu<sup>1,5\*</sup>, Jian-Yuan Zhao<sup>2,\*</sup>, Ding-Wei Ye<sup>1,5\*</sup>

<sup>†</sup>These authors contributed equally to this work.

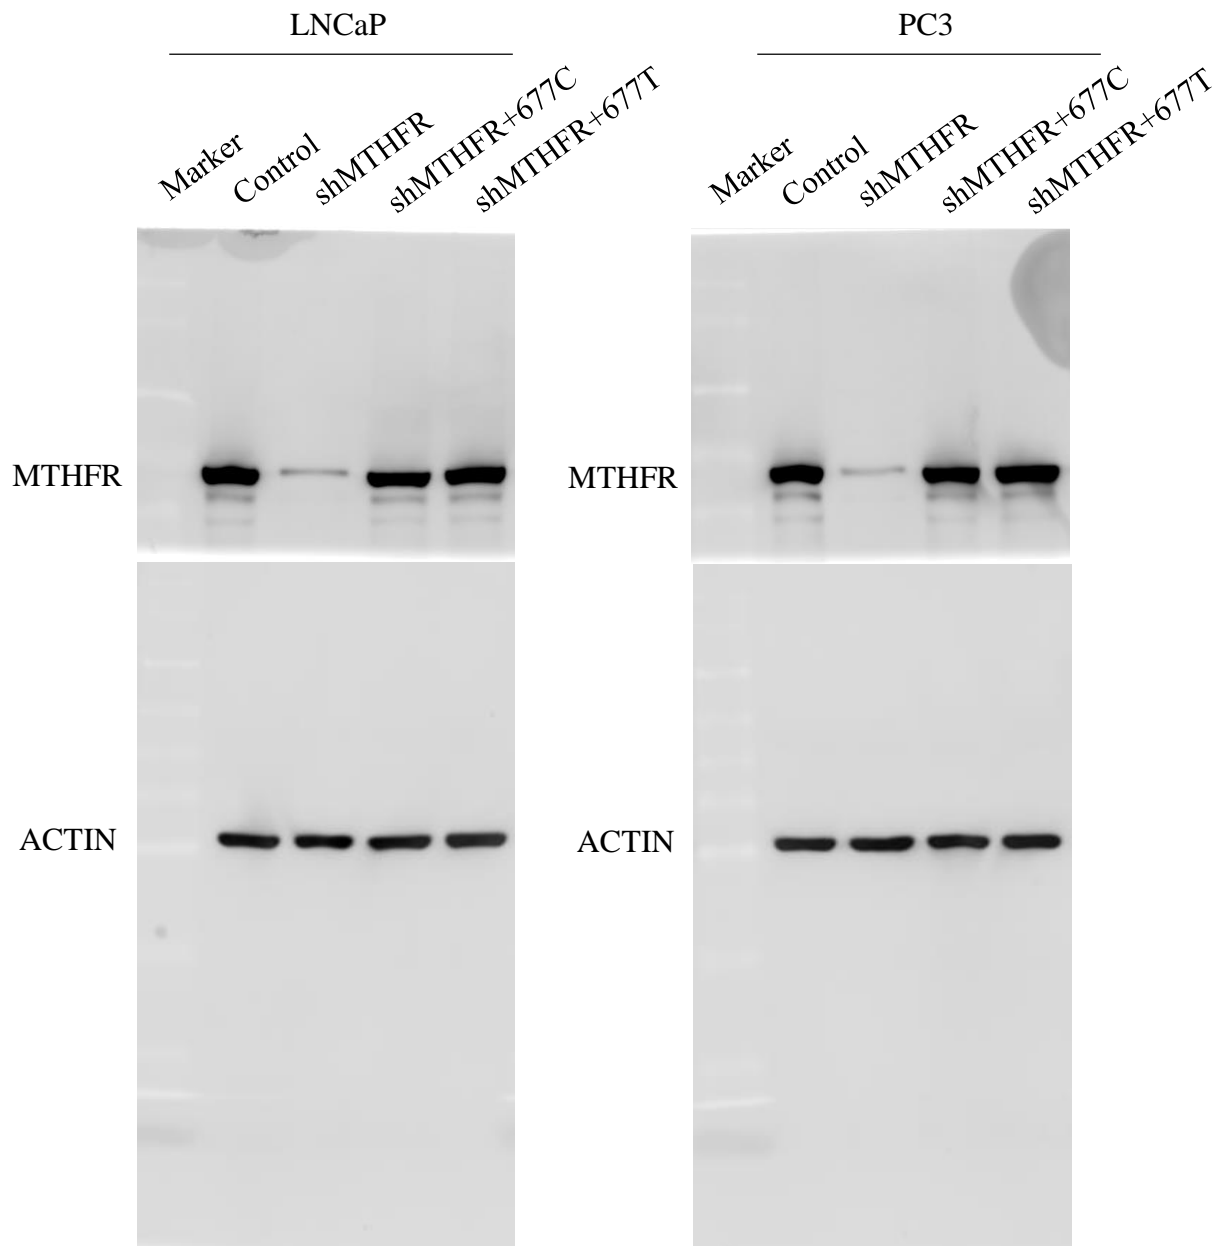

**Supplementary Figure 1.** The full-length blots for knockdown efficiency of *shMTHFR* and protein expression of MTHFR after restoration of wild-type or mutant *MTHFR* gene measured by western blot.
